# Supplementary material
Source: publisher figshare collection journal article supplement (https://acs.figshare.com/ndownloader/files/4061410)
Supplement: Supplementary file 1 [file 4061410]

## Supporting Information

### Molecular Networks Created by Charge-Assisted Hydrogen Bonding in Carboxylate Salts of a Bis(amidine)

Sharon Lie, Thierry Maris, Cédric Malveau, Daniel Beaudoin, Fatima Helzy, and  
James D. Wuest\*

*Département de Chimie, Université de Montréal, Montréal, Québec H3C 3J7  
Canada*

| Contents                                                                                                                                                                  | Page |
|---------------------------------------------------------------------------------------------------------------------------------------------------------------------------|------|
| I. <b>Figure S1.</b> Thermal atomic displacement ellipsoid plot of the structure of crystals of <b>(BI/H<sub>2</sub><sup>+2</sup>) (OA<sup>-2</sup>)</b> grown from DMSO. | S3   |

|       |                                                                                                                                                                                                                           |     |
|-------|---------------------------------------------------------------------------------------------------------------------------------------------------------------------------------------------------------------------------|-----|
| II.   | <b>Figure S2.</b> Thermal atomic displacement ellipsoid plot of the structure of crystals of $(\mathbf{BI}/\mathbf{H}^+)_2 (\mathbf{FA}^{-2}) \cdot 4\mathbf{H}_2\mathbf{O}$ grown from DMSO.                             | S4  |
| III.  | <b>Figure S3.</b> Thermal atomic displacement ellipsoid plot of the structure of crystals of $(\mathbf{BI}/\mathbf{H}^+)_2 (\mathbf{TA}^{-2})$ grown from DMSO.                                                           | S5  |
| IV.   | <b>Figure S4.</b> Thermal atomic displacement ellipsoid plot of the structure of crystals of $(\mathbf{BI}/\mathbf{H}^+)_2 (\mathbf{TMA}/\mathbf{H}^{-2}) \cdot \mathbf{H}_2\mathbf{O}$ grown from DMSO.                  | S6  |
| V.    | <b>Figure S5.</b> Comparison of calculated and experimental X-ray powder diffraction patterns for crystals of $(\mathbf{BI}/\mathbf{H}_2^{+2}) (\mathbf{OA}^{-2})$ grown from DMSO.                                       | S7  |
| VI.   | <b>Figure S6.</b> Comparison of calculated and experimental X-ray powder diffraction patterns for crystals of $(\mathbf{BI}/\mathbf{H}^+)_2 (\mathbf{FA}^{-2}) \cdot 4\mathbf{H}_2\mathbf{O}$ grown from DMSO.            | S8  |
| VII.  | <b>Figure S7.</b> Comparison of calculated and experimental X-ray powder diffraction patterns for crystals of $(\mathbf{BI}/\mathbf{H}^+)_2 (\mathbf{TA}^{-2})$ grown from DMSO.                                          | S9  |
| VIII. | <b>Figure S8.</b> Comparison of calculated and experimental X-ray powder diffraction patterns for crystals of $(\mathbf{BI}/\mathbf{H}^+)_2 (\mathbf{TMA}/\mathbf{H}^{-2}) \cdot \mathbf{H}_2\mathbf{O}$ grown from DMSO. | S10 |

\*Author to whom correspondence may be addressed. E-mail: *james.d.wuest@umontreal.ca*

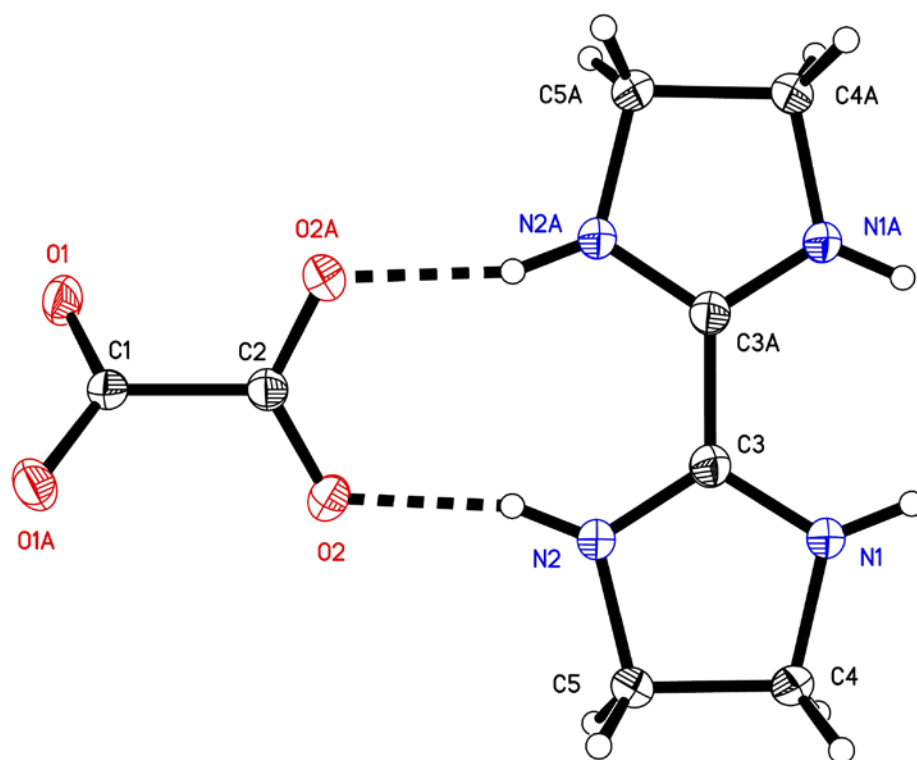

**Figure S1.** Thermal atomic displacement ellipsoid plot of the structure of crystals of  $(\text{BI}/\text{H}_2^{+2})$   $(\text{OA}^{-2})$  grown from DMSO. The ellipsoids of non-hydrogen atoms are drawn at the 50% probability level, and hydrogen atoms are represented by a sphere of arbitrary size. Hydrogen bonds are shown as dotted lines. Atoms labelled with a suffix A are generated by the symmetry operation  $-x+1, y, -z+3/2$ .

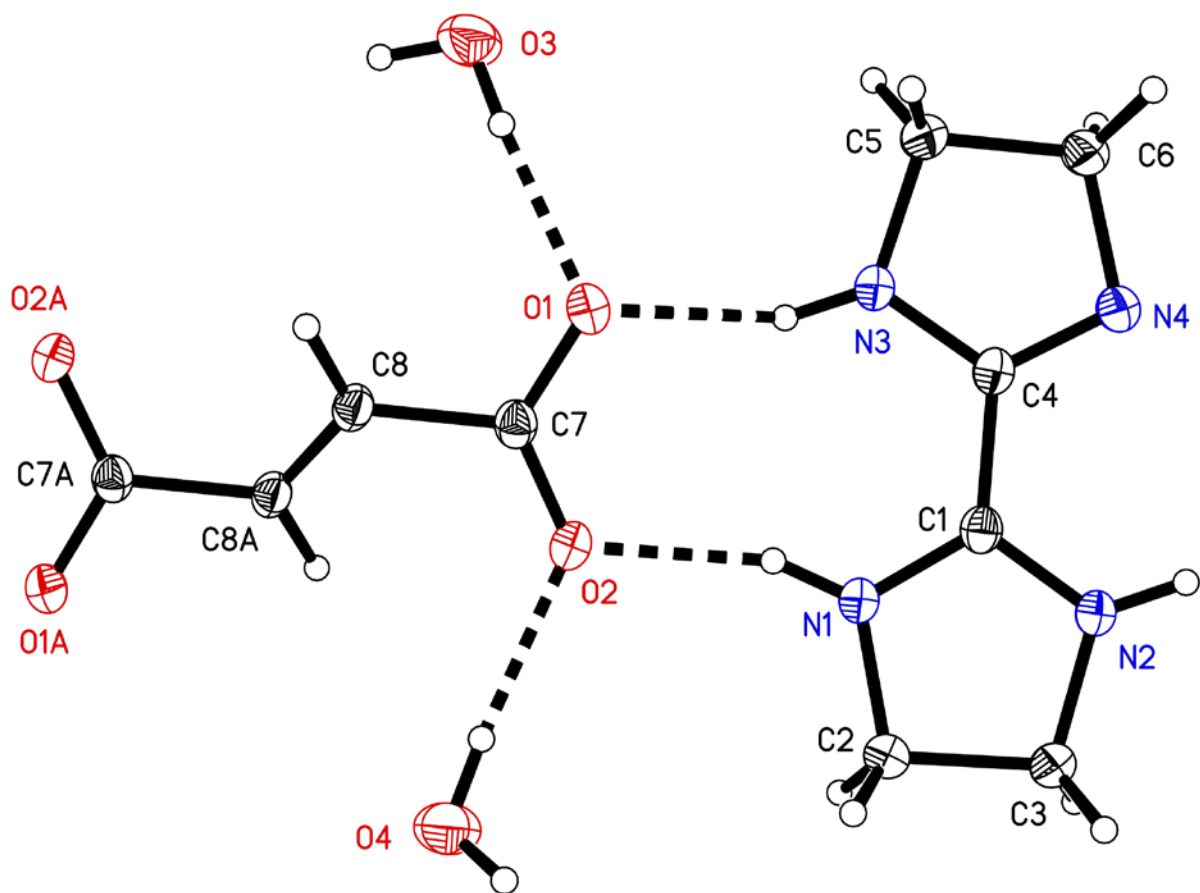

**Figure S2.** Thermal atomic displacement ellipsoid plot of the structure of crystals of  $(\text{BI}/\text{H}^+)_2 (\text{FA}^{-2}) \cdot 4\text{H}_2\text{O}$  grown from DMSO. The ellipsoids of non-hydrogen atoms are drawn at the 50% probability level, and hydrogen atoms are represented by a sphere of arbitrary size. Hydrogen bonds are shown as dotted lines. Atoms labelled with a suffix A are generated by the symmetry operation  $-x, -y+1, -z$ .

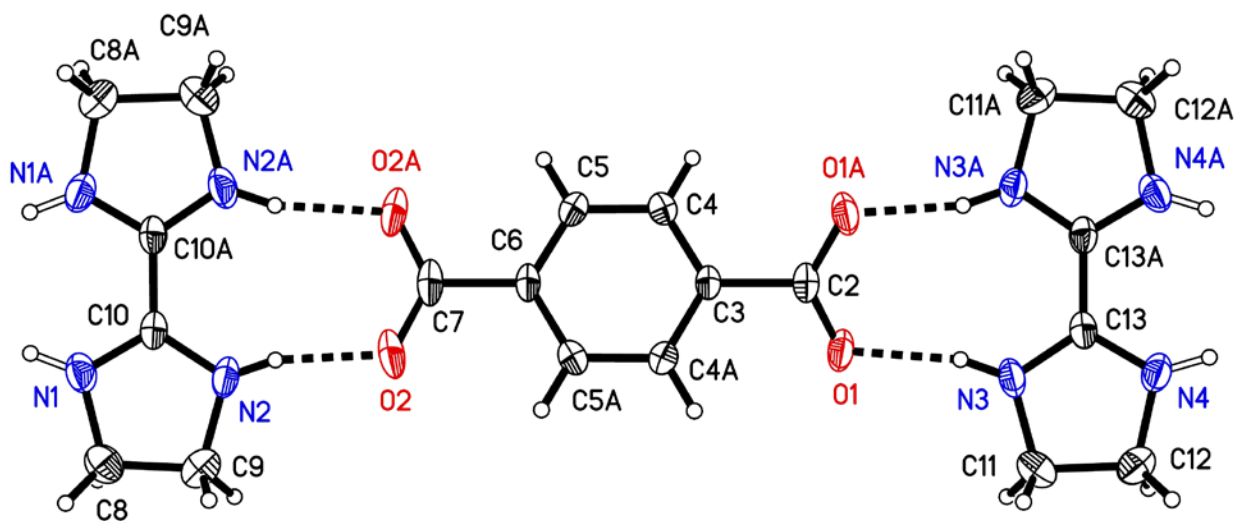

**Figure S3.** Thermal atomic displacement ellipsoid plot of the structure of crystals of  $(\text{BI}/\text{H}^+)_2$  ( $\text{TA}^{-2}$ ) grown from DMSO. The ellipsoids of non-hydrogen atoms are drawn at the 50% probability level, and hydrogen atoms are represented by a sphere of arbitrary size. Hydrogen bonds are shown as dotted lines. Atoms labelled with a suffix A are generated by the symmetry operation  $-x, y, -z+1/2$ .

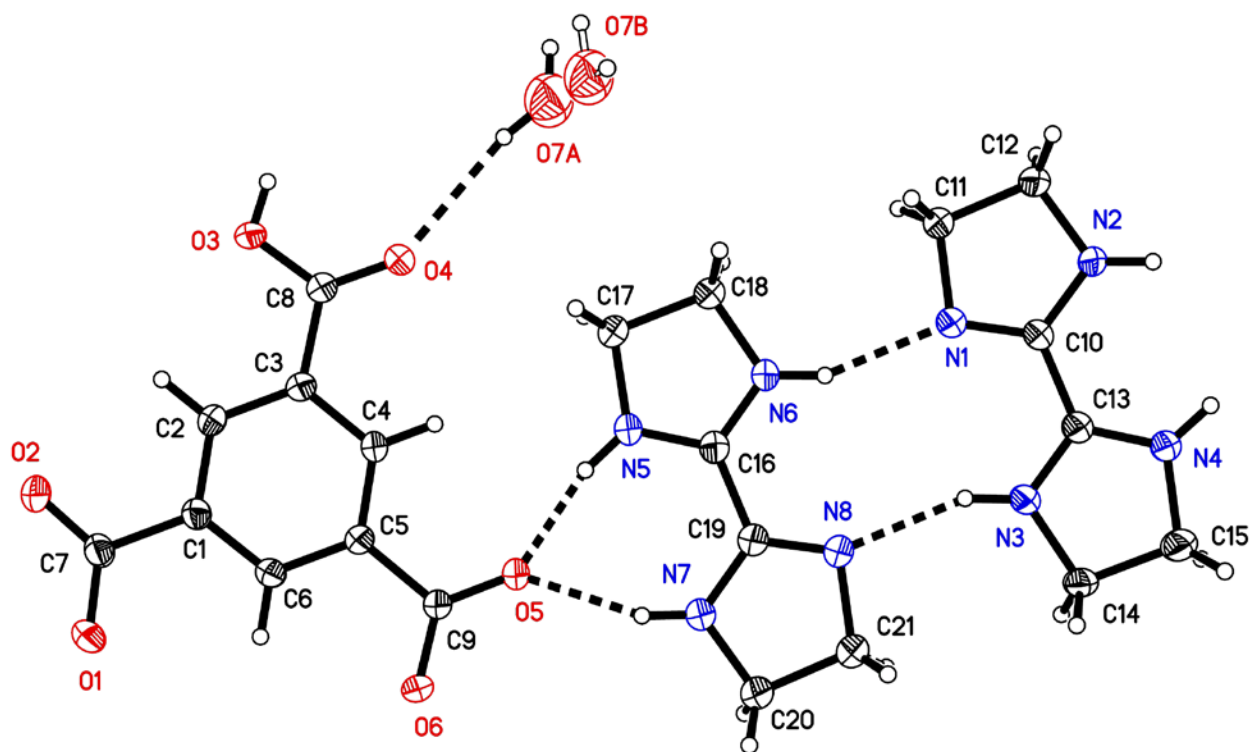

**Figure S4.** Thermal atomic displacement ellipsoid plot of the structure of crystals of  $(\text{BI}/\text{H}^+)_2$   $(\text{TMA}/\text{H}^{2-}) \cdot \text{H}_2\text{O}$  grown from DMSO. The ellipsoids of non-hydrogen atoms are drawn at the 50% probability level, and hydrogen atoms are represented by a sphere of arbitrary size. Hydrogen bonds are shown as dotted lines. The two positions for the statistically disordered water molecules are shown with labels O7A and O7B.

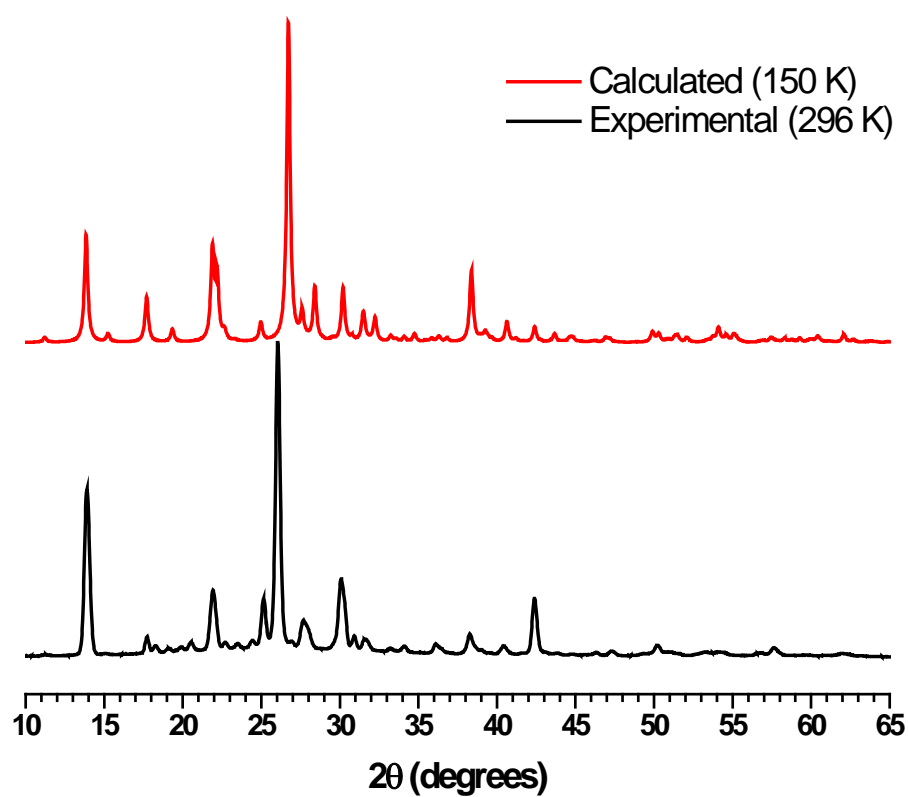

**Figure S5.** Comparison of calculated and experimental X-ray powder diffraction patterns for crystals of  $(\text{BI}/\text{H}_2^{+2})(\text{OA}^{-2})$  grown from DMSO.

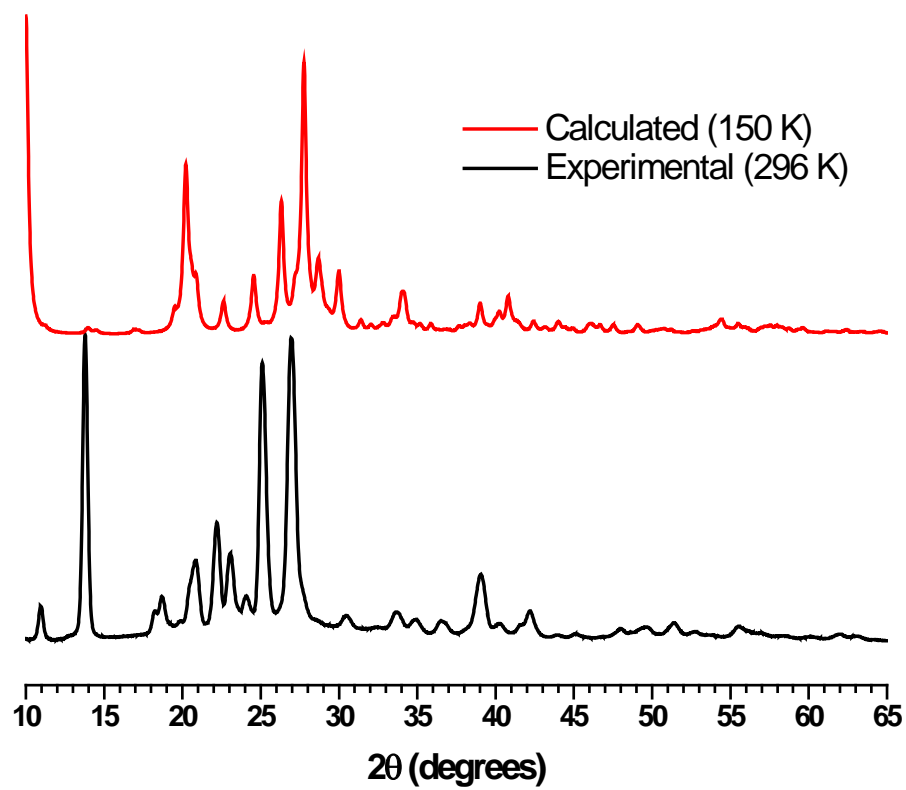

**Figure S6.** Comparison of calculated and experimental X-ray powder diffraction patterns for crystals of  $(\mathbf{BI}/\mathbf{H}^+)_2(\mathbf{FA}^{-2}) \cdot 4\mathbf{H}_2\mathbf{O}$  grown from DMSO.



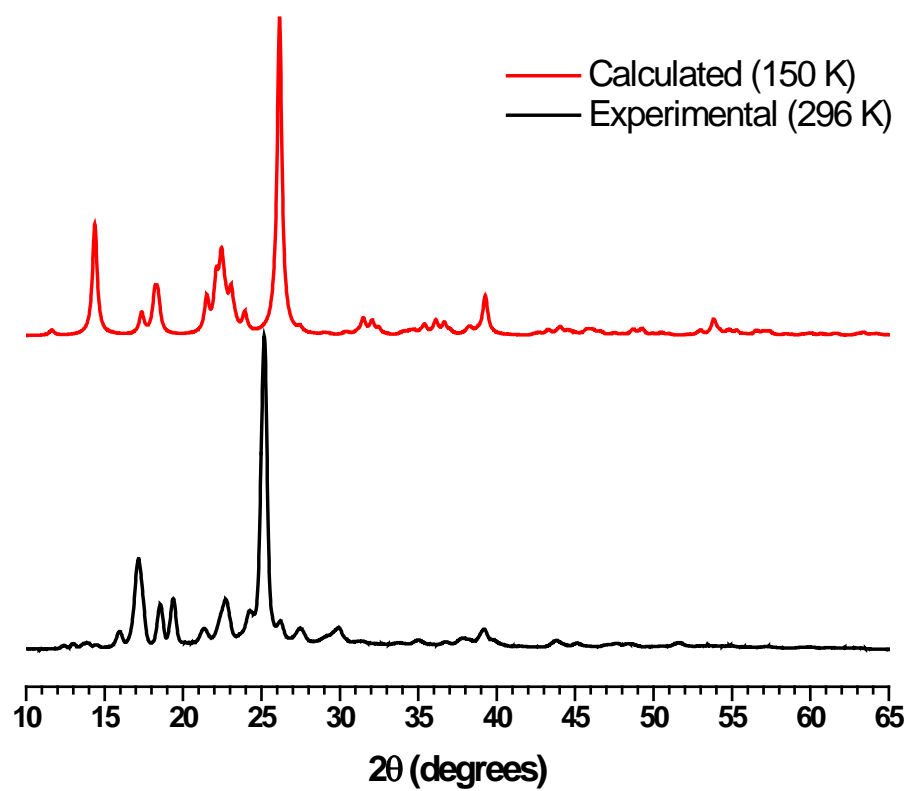

**Figure S7.** Comparison of calculated and experimental X-ray powder diffraction patterns for crystals of  $(\text{BI}/\text{H}^+)_2 (\text{TA}^{-2})$  grown from DMSO.

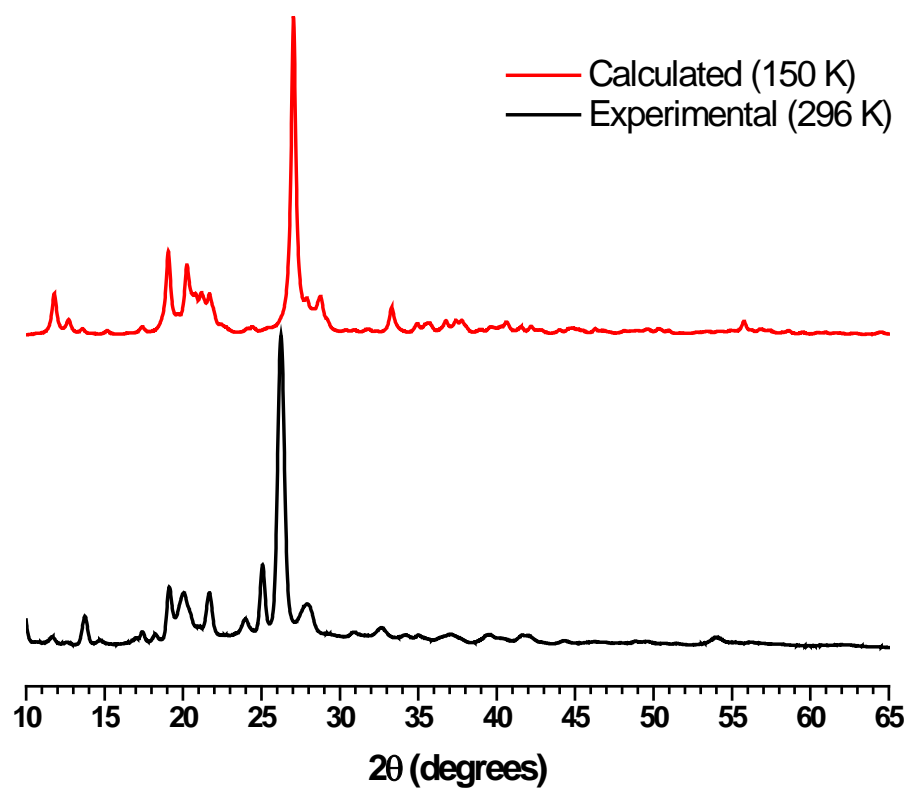

**Figure S8.** Comparison of calculated and experimental X-ray powder diffraction patterns for crystals of  $(\text{BI}/\text{H}^+)_2(\text{TMA}/\text{H}^{2-}) \cdot \text{H}_2\text{O}$  grown from DMSO.
